# Supplementary material
Source: PubMed Central journal article supplement (PMC2453721)
Supplement: 0801055105_0801055105SI.pdf [file 0801055105_0801055105SI.pdf]

# Supporting Information

Liu et al. 10.1073/pnas.0801055105

## SI Materials and Methods

**Plasmids Used for Gene Knock-In.** The plasmid used for introducing the floxed gene into the chromosome of *L. pneumophila* was constructed as follows: First, we removed the PstI site in plasmid pJB908 (1) by ligating PstI-digested DNA that had been treated with mung bean nuclease to give pJB908PstI<sup>-</sup>. We then inserted a cassette containing two directly repeated *loxP* sites from pZLlox-PGm (2) into pJB908PstI<sup>-</sup> as a BamHI/SalI fragment to give pJBloxP. After removing the BamHI and SacI sites by enzyme digestion followed by mung bean nuclease treatment, we expanded the multiple cloning site of pJBloxP by cloning a DNA fragment obtained by annealing from oligomers 5'-CGGAGCTCGGT-ACCGGATCCGCGGCCGCGCTAGCTCTAGAATTTAA A-TCTCGAGTGCA-3' and 5'-CTCGAGATTTAAATTCTAG-AGCTAGCGCGGCCGCGGATCC GGTACCGAGCTCCG-3' into SmaI/PstI digested vector. This manipulation introduced the following restriction sites between the two *loxP* elements: SacI, KpnI, NotI, BamHI, NheI, XbaI, *SwaI* and XhoI. The new plasmid was named pDP1. Using primers 5'-CTAGCCCCGGGCTGGGC-TATCTGGACAAGGG-3' and 5'-CATTCCCCGGGGAATC-GAAATCTCGTGATGG-3', we cloned a 1 kb DNA fragment coding for the kanamycin resistance gene from pBBR1MCS-2 (3) as SmaI fragment into the *SwaI* site of pZL505 to give pZL506. Finally, we made pZL788 by cloning the floxing cassette from pZL506 into pBluescript and this plasmid is the source of a floxed cassette for future experiments.

Using the  $\pi$  protein-dependent plasmid pSB890 (4), we constructed pZL790, which is the basis for introducing floxed gene into *L. pneumophila* chromosome as follows: Two 1 kb DNA fragments flanking the intergenic region of *L. pneumophila* genes *lpg2528* and *lpg2529* were amplified with primer pairs Up5'NotI/Up3'SalI (5'-CCTGCGGCCGCAACGCAAATTTCAACATGCC-3'/5'-CCTGTGACCCCCGGGCAAATAGCAACCGCAATG-3') and Down5'SalI/Down3'EcoRV (5'-CCTGTGCGACTTCTCAC-CAATTAAGTCAC-3'/5'-CCTGATATCGTCTATGATCAT-GAAATTAT-3'). After digesting with the appropriate restriction enzymes, the two DNA fragments were ligated into NotI/SmaI digested pSB890 to give pZL790. From this point, constructs for introducing each of the knock-in genes were made individually according to the availability of restriction sites in the gene of interest. For example, the plasmid used for the *icmQ* knock-in was constructed as follows: We first cloned the *icmQ* gene into pZL788 as a SacI/XbaI fragment to give pZL789. We then inserted the promoter region of *icmQ* (5) as a 136 bp EcoRV/SalI DNA fragment by PCR using primers PicmQup (5'-CCTGATATCAT-GATGAACGT GGTTCAA-3') and PicmQ down (5'-CCTGATATCATGATGAACGTGGTTTCAA-3') into SmaI/SalI digested pZL790 to give pZL793. The floxed *icmQ* gene was then cloned into pZL793 to give pZL794. Finally, we cloned a 0.8 kb chloramphenicol resistance gene as a NotI fragment into pZL795 to give pZL795Cm, which was used to introduce *icmQ* into the intergenic region between *lpg2528* and *lpg2529*. In each step, we verified the correctness of the inserts by DNA sequencing. Plasmids for introducing other genes were constructed with similar procedures. Details for these cloning steps and the sequences of primers used are available upon request.

**Construction of *L. pneumophila* Knock-In Strains.** After obtaining a plasmid designed for introducing a floxed gene into the chromosome of *L. pneumophila*, we mobilized the construct into the corresponding *L. pneumophila* deletion mutant of the gene by tri-parental mating (6). Transconjugants selected on media

containing 20  $\mu$ g/ml kanamycin and 100  $\mu$ g/ml streptomycin were streaked onto CYET media containing 4% sucrose to obtain colonies in which the integrated plasmid had been looped out by a second recombination event. We then identified candidate knock-in strains by screening colonies that were resistant to kanamycin but sensitive to the plasmid backbone marker chloramphenicol. After verifying the candidate strains by PCR analysis, we examined the intracellular growth of several candidates in mouse bone marrow-derived macrophages. In each case, the wild-type strain, Lp02, and the original deletion mutant were used as controls. Knock-in strains that could fully complement the mutation were retained for future use.

To construct the *dotA* knock-in strain, instead of using the *dotA* deficient strain Lp03, which contains a point mutation (7), we constructed an in-frame deletion mutant by a standard procedure (2). Two appropriately digested fragments amplified by PCR with oligoes  $\Delta$ dotAup5'SalI 5'-CTAGGTCGACGCCTAAGT-CAATTTTTTCAATA-3' dotAup3'BamHI 5'-TTGCGGATC-CGAGATAACTCAAGGCGGCTTCC-3' dotAdown5'BamHI 5'-CTGCGGATCCGGTGGGTATACAGG CTGGGCAG-3' dotAdown3'SacI 5'-CAGAGAGCTCCAGGGTCAGTAAAC-GAATGAGC-3' were inserted pSR47 (2) digested with SalI and SacI. The mutant was obtained following a protocol described elsewhere (2).

**Plasmids for Inducible Expression of *cre*.** We constructed plasmids that allow IPTG-inducible expression of *cre* by placing tandem copies of the *lac* operator between the *P<sub>trc</sub>* promoter and the *cre* gene. In the final phases of this multiple-step plasmid construction procedure, plasmids carrying different copies of the *lac* operator were introduced into the knock-in *L. pneumophila* strain and the efficiency of IPTG-induced gene deletion was empirically examined for each strain. Details for construction are as follows: First, we cloned a DNA fragment derived from annealing 5'-ATGTGTGGAATTGTGAGCGGATAA-CAATTTACACAGGGTACCC-3' and 5'-GGGTACCCGTG-TGAAATTGTTATCCGCTCACAAATTTCCACACATGTAC-3' into KpnI/HincII (the elements of the *lac* operator were italicized) digested pBBR1MCS-2 (3) to give pOP2. Similarly, we constructed pOP3 by inserting the same DNA fragment into KpnI/EcoRV digested pOP2. We then increased the tandem repeats of the *lac* operator to 4 copies by inserting this DNA element into KpnI/SmaI digested pOP3 to give pOP4.

To prepare a source of the *cre* gene associated with the necessary restriction sites, we amplified the gene using the primer pair 5'-CGATAGATCTACAGGAAACAGCTAT-GTCCAATTTACTGACCGTACAC-3' and 5'-CTAGTCTA-GACTAATCGCCATCTTCCAGCA-3' and inserted the fragment into XbaI/BamHI digested pBluescript as a BglII/XbaI fragment to give pBluecre. A KpnI/XbaI DNA fragment removed from pBluecre was cloned into similarly digested pOP4 to give pZL500.

To add another four copies of operator upstream of the *cre* gene, we amplified the operator region of pOP4 by PCR with primers 5'-GACTCACTATAGGGCGAATTGG-3' and 5'-CTAGCTCGAGGGCTTTACTACTTTATGCTTCC-3'. The PCR product was digested with XhoI/SmaI and then inserted into similarly digested pZL500 to give pZL502. These plasmids were the sources of the *cre* gene controlled by different copies of the *lac* operator.

A series of plasmids used to express *cre* under the control of IPTG were made from pZL188, a derivative of pJB908 config-

ured for protein expression. First, a BglIII/XbaI DNA fragment amplified from pZL500 or pZL502 with primer 5'-CA-GAGATCTGGCTTTACACTTTATGCTTC-3' and 5'-CTAGCTCGAGGGCTTTACACT TTATGCTTCC-3' was inserted into BglIII/XbaI digested pZL188 to give pZL638 and pZL639, respectively. To gain tighter control of the expression of the *cre* gene, we inserted the same DNA fragments into BamHI/XbaI digested pZL638 or pZL639 to produce pZL680 and pZL681, respectively. These two plasmids exhibited the ideal properties in controlling the expression of *cre* in some of the *dot/icm* or *sdhA* knock-in strains, i.e., a low level of Cre in the absence of IPTG (the strains grew normally in broth containing kanamycin), but efficient induction can be achieved by addition of IPTG (see main text).

**Construction of Strains Used for Intracellular Growth Experiments.** For each knock-in strain, after verifying its intracellular growth phenotype, several of the *cre*-expressing plasmids were individually introduced and the resulting strains were examined for IPTG-induced deletion of the floxed gene in broth grown and phagocytosized bacteria. Strains in which expression of *cre* was tightly controlled and responsive to IPTG were retained for further studies. For example, pZL680 exhibited the best control in the *icmQ* knock-in strain and thus was used for all experiments involving in this strain.

**Antibodies, Immunoprecipitation, TCA Precipitation, and Immunoblotting.** For immunoblotting, both the IcmQ- and the SdhA-specific antibodies (6, 8) were used at 1:1000. To detect IcmQ in infected

cells, we added 4  $\mu$ l of an IcmQ-specific antibody (6) to lysates prepared from  $5 \times 10^7$  macrophages infected with the *icmQ* knock-in strain for the indicated time. Precipitates were prepared by incubating 40  $\mu$ l of protein G conjugated agarose with the lysates for 12 h at 4°C. After washing 3 times with the lysis buffer, samples resolved by SDS/PAGE were subjected to detection by immunoblotting. Translocated LidA was detected by fractionation of  $5 \times 10^7$  infected macrophages with 1% digitonin following a described procedure (9).

To detect SdhA in infected cells, we lysed  $1 \times 10^8$  infected cells with 1 ml of lysis buffer (50 mM Tris-HCl, pH 7.4, 150 mM NaCl, 1 mM EDTA, 1% Triton X-100, 1 mM  $\text{Na}_3\text{VO}_4$ , 1 mM PMSF, 10  $\mu$ g/ml aprotinin, 2  $\mu$ g/ml leupeptin, 0.7  $\mu$ g/ml pepstatin). The soluble fraction of the lysates obtained by centrifugation at 16,000 g at 4°C was incubated with 10% trichloroacetic acid at 4°C for 2 h. The pellet were then collected by centrifugation, washed twice with cold acetone, resuspended in 2 $\times$  Laemmli buffer and separated by SDS/PAGE. Unless otherwise noted, proteins were transferred to nitrocellulose membranes after SDS/PAGE. After incubating with the appropriate primary antibodies, washed membranes were incubated with an appropriate IRDye infrared secondary antibody. The Odyssey infrared imaging system was used for signal detection and for quantitating the intensity of protein bands (Li-Cor Biosciences).

1. Bardill JP, Miller JL, Vogel JP (2005) IcmS-dependent translocation of SdeA into macrophages by the Legionella pneumophila type IV secretion system. *Mol Microbiol* 56:90–103.
2. Luo ZQ, Isberg RR (2004) Multiple substrates of the Legionella pneumophila Dot/Icm system identified by interbacterial protein transfer. *Proc Natl Acad Sci USA* 101:841–846.
3. Kovach ME, et al. (1995) Four new derivatives of the broad-host-range cloning vector pBBR1MCS, carrying different antibiotic-resistance cassettes. *Gene* 166:175–176.
4. Kaniga K, Bossio JC, Galan JE (1994) The Salmonella typhimurium invasion genes *invF* and *invG* encode homologues of the AraC and PulD family of proteins. *Mol Microbiol* 13:555–568.
5. Gal-Mor O, Zusman T, Segal G (2002) Analysis of DNA regulatory elements required for expression of the Legionella pneumophila *icm* and *dot* virulence genes. *J Bacteriol* 184:3823–3833.
6. Dumenil G, Isberg RR (2001) The Legionella pneumophila IcmR protein exhibits chaperone activity for IcmQ by preventing its participation in high-molecular-weight complexes. *Mol Microbiol* 40:1113–1127.
7. Berger KH, Merriam JJ, Isberg RR (1994) Altered intracellular targeting properties associated with mutations in the Legionella pneumophila *dotA* gene. *Mol Microbiol* 14:809–822.
8. Laguna RK, et al. (2006) A Legionella pneumophila-translocated substrate that is required for growth within macrophages and protection from host cell death. *Proc Natl Acad Sci USA* 103:18745–18750.
9. Derre I, Isberg RR (2005) LidA, a translocated substrate of the Legionella pneumophila type IV secretion system, interferes with the early secretory pathway. *Infect Immun* 73:4370–4380.
10. Berger KH, Isberg RR (1993) Two distinct defects in intracellular growth complemented by a single genetic locus in Legionella pneumophila. *Mol Microbiol* 7:7–19.
11. Vogel JP, Andrews HL, Wong SK, Isberg RR (1998) Conjugative transfer by the virulence system of Legionella pneumophila. *Science* 279:873–876.











**Table S1. Strains of *L. pneumophila* used in this study**

| Strains            | Genotypes                                                                                                                  | Ref.       |
|--------------------|----------------------------------------------------------------------------------------------------------------------------|------------|
| Lp02               | Philadelphia-1 <i>rpsL hsdR thyA</i>                                                                                       | 10         |
| Lp03               | Lp02 $\dot{d}otA^-$                                                                                                        | 10         |
| Lp02 $\Delta dotA$ | <i>dotA</i> in-frame deletion in Lp02                                                                                      | This study |
| Lp02 $\Delta icmQ$ | <i>icmQ</i> in-frame deletion in Lp02                                                                                      | 6          |
| Lp02 $\Delta dotG$ | <i>dotG</i> in-frame deletion in Lp02                                                                                      | 11         |
| Lp02 $\Delta dotO$ | <i>dotO</i> in-frame deletion in Lp02                                                                                      | 11         |
| Lp02 $\Delta sdhA$ | <i>sdhA</i> in-frame deletion in Lp02                                                                                      | 8          |
| ZL84               | The knock-in cassette containing the <i>npfII</i> gene in the intergenic site of <i>lpg2528</i> and <i>lpg2529</i> in Lp02 | This study |
| ZL85               | <i>icmQ</i> knock-in                                                                                                       | This study |
| DotAin             | <i>dotA</i> knock-in in Lp02 $\Delta dotA$                                                                                 | This study |
| ZL86               | <i>dotG</i> knock-in in Lp02 $\Delta dotG$                                                                                 | This study |
| ZL87               | <i>dotO</i> knock-in in Lp02 $\Delta dotO$                                                                                 | This study |
| ZL284              | <i>sdhA</i> knock-in in Lp02 $\Delta sdhA$                                                                                 | This study |
| ZL91               | pZL680 in DotAin                                                                                                           | This study |
| ZL92               | pZL680 in ZL86                                                                                                             | This study |
| ZL94               | pZL680 in ZL87                                                                                                             | This study |
| ZL117              | pZL680 in ZL85                                                                                                             | This study |
| ZL249              | pZL683 in ZL284                                                                                                            | This study |
